Anesthesiology  
83:270-276, 1995  
© 1995 American Society of Anesthesiologists, Inc.  
Lippincott-Raven Publishers

## Improved Amplitude of Myogenic Motor Evoked Responses after Paired Transcranial Electrical Stimulation during Sufentanil/Nitrous Oxide Anesthesia

Cor J. Kalkman, M.D.,\* Leon H. Ubags,† Henk D. Been, M.D.,‡ Astrid Swaan, M.D.,† John C. Drummond, M.D.§

**Background:** Measurement of motor evoked responses to transcranial stimulation (tc-MER) is a technique for intraoperative monitoring of motor pathways in the brain and spinal cord. However, clinical application of tc-MER monitoring is hampered because most anesthetic techniques severely depress the amplitude of motor evoked responses. Because paired electrical stimuli increase tc-MER responses in awake subjects, we examined their effects in anesthetized patients undergoing surgery.

**Methods:** Eleven patients whose neurologic condition was normal and who were undergoing spinal or aortic surgery were anesthetized with sufentanil-N<sub>2</sub>O-ketamine. Partial neuromuscular blockade (single-twitch height 25% of baseline) was maintained with vecuronium. Single and paired electrical stimuli were delivered to the scalp, and compound action potentials were recorded from the tibialis anterior muscle. The amplitude and latency of the tc-MERs were measured as the interval between paired stimuli was varied between 0 (single stimulus) and 10 ms. All recordings were completed before spinal manipulation or aortic clamping.

**Results:** Median amplitude of the tc-MER after a single stimulus was 106  $\mu$ V (10th-90th percentiles: 23-1,042  $\mu$ V), and the latency to onset was 33.2  $\pm$  1.4 ms (SD). With paired stimuli (interstimulus interval 2-3 ms), tc-MER amplitudes increased to 285 (79-1,605)  $\mu$ V, or 269% of the single-pulse response ( $P < 0.01$ ). Reproducibility of individual responses increased with paired stimulation. Onset latency decreased to 31.4  $\pm$  3.2 ms

( $P < 0.05$ ). Maximum amplitude augmentation was observed with interstimulus intervals between 2 and 5 ms and in patients with low-amplitude responses after single-pulse stimulation.

**Conclusions:** Application of paired transcranial electrical stimuli increases amplitudes and reproducibility of tc-MERs during anesthetic-induced depression of the motor system. The effect may represent temporal summation of stimulation at cortical or spinal sites. The results of this study warrant further clinical evaluation of paired transcranial stimulation. (Key words: Anesthetics, gases: nitrous oxide. Anesthetics, opioid: sufentanil. Monitoring, spinal cord function: motor evoked response; transcranial stimulation.)

INTRAOPERATIVE monitoring of motor evoked responses to transcranial electrical or magnetic stimulation (tc-MERs) provides a method for monitoring conduction in descending motor pathways during operations in which there is a risk of spinal cord injury. The addition of tc-MERs to intraoperative somatosensory evoked response monitoring may, at least theoretically, decrease the occurrence of false-negative results that have been reported during monitoring of somatosensory evoked responses.<sup>1,2</sup> A retrospective survey by the Scoliosis Research Society involving 33,000 patients undergoing spinal surgery revealed that 28% of the neurologic damage that occurred had not been detected by monitoring of somatosensory evoked potentials.<sup>3</sup> Responses of muscle origin, referred to as compound muscle action potentials (CMAPs), are highly specific for impulses transmitted by the motor tracts and can be recorded noninvasively from muscles in the upper or lower limbs. In awake subjects, CMAPs resulting from transcranial stimulation (TCS) are large (several millivolts) and can be recorded after the application of a single transcranial stimulus.

However, during anesthesia considerable tc-MER amplitude depression occurs with most anesthetic regimens. The myogenic response is completely abolished, even with very low concentrations of volatile anesthetic agents, which makes tc-MER recording impossible at

\* Staff Anesthesiologist, Department of Anesthesiology.

† Research Associate, Department of Anesthesiology.

‡ Staff Orthopedic Surgeon, Department of Orthopedics.

§ Professor of Anesthesiology, Department of Anesthesiology, University of California at San Diego; Anesthetist-in-Chief, Department of Veterans Affairs Medical Center, San Diego, California.

Received from the Department of Anesthesiology, Academic Medical Center, University of Amsterdam, Amsterdam, The Netherlands. Submitted for publication June 16, 1994. Accepted for publication April 11, 1995. Presented in part at the annual meeting of the American Society of Anesthesiologists, Washington, D.C., October 1993.

Address reprint requests to Dr. Kalkman: Academisch Ziekenhuis bij de Universiteit van Amsterdam, Meibergdreef 9, 1105 AZ Amsterdam, The Netherlands.

end-tidal isoflurane concentration. N<sub>2</sub>O is also a powerful depressant. Benzodiazepines, barbiturates, and other sedatives that have only minor effects on tc-MERs are used to maintain or increase muscle tone. Ketamine, propofol, and synthetic opioids have been able to record tc-MERs using a paired-stimulus technique,<sup>5,6,11</sup> although the degree of depression in the motoneuronal system may be sufficient to preclude effective intraoperative monitoring in a subset of patients.

One possible strategy for overcoming anesthetic-induced depression is facilitation of the motor system responsiveness. It has been suggested that contraction of the target muscle before tc-MERs increases the amplitude of tc-MERs.<sup>12-14</sup> Involvement of the peripheral nerve can also be achieved by the peripheral nerve stimulation (PNS) of dermatomal stimulation immediately before tc-MERs.<sup>15</sup> The "priming" of the anterior horn cell input from the peripheral nerve is presumed to be the mechanism. It also appears that facilitation of responsiveness can be achieved by electrical stimulation of the motor system origin.

In nonanesthetized subjects, paired stimuli with an interstimulus interval of 2-3 ms has been shown to increase the amplitude of tc-MERs.<sup>17</sup> The presumption has been that facilitation also occurs at the level of the motor system, although some or all of the effect may be due to facilitation of the cerebral cortex. The current study was designed to determine whether the facilitating effect of paired electrical stimulation observed in nonanesthetized subjects during sufentanil-N<sub>2</sub>O anesthesia also occurs during surgical procedures with general anesthesia. The study compared the amplitude of tc-MERs in response to single and paired electrical stimuli with the response to single electrical stimuli, at various ISIs.

### Materials and Methods

Nine patients undergoing spinal surgery for thoracic aortic aneurysm were informed consent to participate in this study. The neurologic examination was normal. The patients received a premedication orally, 1 h before surgery. Anesthesia was induced with etomidate 0.3 mg/kg and sufentanil

## MOTOR RESPONSES TO PAIRED TRANSCRANIAL STIMULATION

end-tidal isoflurane concentrations as low as 0.3%.<sup>4,5</sup> N<sub>2</sub>O is also a powerful depressant of tc-MER,<sup>6</sup> as are benzodiazepines,<sup>7,8</sup> barbiturates and propofol.<sup>8</sup> Drugs that have only minor effects on tc-MERs are those known to maintain or increase muscle tone and include etomidate,<sup>8</sup> ketamine,<sup>9,10</sup> and synthetic opioids.<sup>8</sup> Most authors have been able to record tc-MERs using a N<sub>2</sub>O-opioid technique,<sup>5,6,11</sup> although the depression of conduction in the motoneuronal system may be so severe, as to preclude effective intraoperative tc-MER monitoring in a subset of patients.

One possible strategy for overcoming anesthetic-induced depression is facilitation of the motoneuronal system responsiveness. It has been shown that voluntary contraction of the target muscle group improves the amplitude of tc-MERs.<sup>12-14</sup> Involuntary facilitation can also be achieved by the properly timed application of dermatomal stimulation immediately before stimulation of motor neurons.<sup>15,16</sup> The facilitation that is observed is presumed to be the result of some sort of "priming" of the anterior horn cell as a result of afferent input from the peripheral nervous system to the dorsal horn. It also appears that facilitation of myoneural responsiveness can be achieved by stimuli of central nervous system origin.

In nonanesthetized subjects, electrical TCS using paired stimuli with an interstimulus interval (ISI) of 2-3 ms has been shown to increase the amplitude of tc-MERs.<sup>17</sup> The presumption has been that this facilitation also occurs at the level of the spinal cord, although some or all of the effect could be at the level of the cerebral cortex. The current study sought to determine whether the facilitating effect of paired stimulation observed in nonanesthetized subject persists during sufentanil-N<sub>2</sub>O anesthesia in patients undergoing surgical procedures with an inherent risk of spinal cord injury. The study compared the latency and amplitude of tc-MERs in response to single transcranial electrical stimuli with the responses to paired electrical stimuli, at various ISIs.

### Materials and Methods

Nine patients undergoing spinal surgery and two patients undergoing thoracic aortic aneurysm repair gave informed consent to participate in this institutionally approved study. The neurologic status of all patients was normal. The patients received diazepam, 10 mg orally, 1 h before surgery. Anesthesia was induced with etomidate 0.3 mg/kg and sufentanil 1.5 µg/kg and was

maintained with sufentanil 0.5 µg · kg<sup>-1</sup> · h<sup>-1</sup> and N<sub>2</sub>O 50%. When there were clinical signs that the level of anesthesia was light, ketamine 0.3-0.5 mg/kg was administered intravenously. Muscle relaxation was monitored electromyographically at the hypothenar eminence with a Relaxograph (Datex, Finland), and the amplitude of the single-twitch response was maintained at 25% of control with vecuronium with a closed-loop infusion system. Monitoring included the electrocardiogram, hemoglobin blood O<sub>2</sub> saturation by pulse oximetry, central venous pressure, invasive arterial blood pressure, end-tidal CO<sub>2</sub> concentration, and nasopharyngeal temperature. Figure 1 shows the apparatus used to record tc-MERs to single and paired TCS. Two identical transcranial electrical stimulators (D180A, Digi-timer, Welwyn Garden City, UK) were used. The stimuli from both units were delivered to the scalp by two 9-mm silver electroencephalographic disc electrodes, attached to the skin with collodion, with the anode positioned at C<sub>z</sub><sup>18</sup> and the cathode at F<sub>z</sub> (International 10-20 system). The units were triggered either simultaneously or sequentially. The ISI could be varied between 0 (single pulse) and 10 ms. Myogenic responses were recorded from the skin over the left and right tibialis anterior muscles with adhesive gel Ag-AgCl electrodes (Cleartrace, Medtronic Andover Medical, Haverhill, MA); the active electrode was placed over the muscle belly, referenced to an electrode placed over the muscle tendon. A ground electrode was placed on the left leg, proximal to the knee. The signal was amplified 5,000-20,000 times (adjusted to obtain maximum vertical resolution), and filtered between 30 and 1,500 Hz with a biologic amplifier (3T PS-800, Twente Technology Transfer, Twente, The Netherlands). These amplifiers have an extremely high-input impedance (>10<sup>12</sup> Ω), and the common mode rejection ratio is greater than 95 dB. The responses were displayed and stored on a Macintosh Quadra computer (Apple Computer, Cupertino, CA) with 12-bit analog-to-digital conversion and motor evoked response (MER) acquisition software written with the LabView data acquisition development system (National Instruments, Austin, TX).

After achieving a stable anesthetic state, at least 20 min after induction of anesthesia, stimulus intensity (0-100%, ≈0-1,200 V) was adjusted to achieve maximal responses with single-pulse stimulation, typically 600-700 V. At least 20 min after skin incision, but before any surgical interventions that might have resulted in impaired spinal cord functioning, quadru-

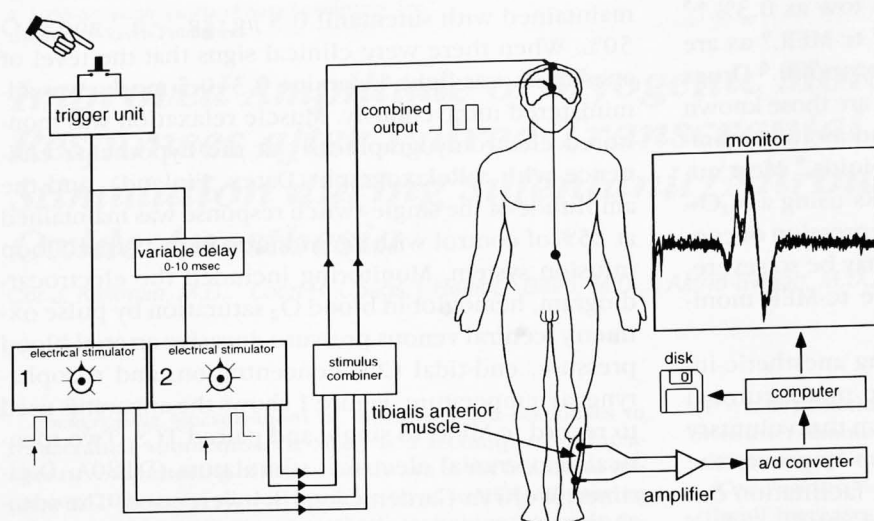

Fig. 1. Experimental apparatus for single or paired transcranial electrical stimulation and recording of compound muscle action potentials (CMAPs) from the tibialis anterior muscle. Stimulation was triggered manually. The trigger pulse to the second stimulator unit was delayed between 0 and 10 ms. Output from the two units was combined by means of diodes.

uplicate CMAPs in response to single and paired TCS were recorded. Responses to paired stimulation were acquired every 2 min, while ISI was increased from 1 to 2, 3, 5, 7, and 10 ms. The effect of paired stimulation was also assessed after reducing the stimulus intensity to a level that elicited threshold responses to a single transcranial stimulus.

Peak-to-peak amplitudes and onset latency, as measured from the beginning of the first pulse, were determined from the average of the four individual responses. tc-MER latencies were normally distributed and are expressed as mean  $\pm$  SD. The coefficient of variation was calculated for the amplitudes of four consecutive single-sweep tc-MERs acquired with single or paired (ISI 3 ms) stimulation. Because tc-MER amplitude data did not appear to be normally distributed, amplitudes are presented as medians, with the 10th and 90th percentiles. Differences in amplitude and latency between single and paired stimulation were compared using Wilcoxon's signed-rank test.

## Results

Patient characteristics are presented in table 1. Single-pulse TCS elicited tc-MERs in all but one patient. Large interpatient amplitude variability was observed. The median amplitude of the right tibialis anterior muscle response was 106 (23–1,042)  $\mu$ V, and the onset latency was  $33.2 \pm 1.4$  ms. With paired TCS (ISI 2–3 ms), median tc-MER amplitude increased to 285 (79–1,605)  $\mu$ V or 269% of the single-pulse response ( $P <$

0.01) (fig. 2). With single-pulse stimulation the coefficient of variation for the amplitude of four consecutive responses within an individual patient was 43%. With paired stimulation, with an ISI of 3 ms, the coefficient of variation was 17%. When ISI was increased to 5 or 7 ms, no further augmentation occurred. An ISI of 10 ms often elicited two overlapping responses of lower amplitude.

Onset latency decreased from  $33.2 \pm 1.4$  to  $31.4 \pm 3.2$  ms ( $P < 0.05$ ) for paired (ISI 3 ms) versus single TCS respectively. When stimulus intensity was reduced to a level that elicited a threshold response with single stimulation, the amplitude-augmenting effect of paired stimulation became more pronounced. Similarly, in patients in whom maximal single-pulse stimulation elicited only low-amplitude responses, the effect of paired stimulation was more pronounced than in patients who had high-amplitude responses to single-pulse TCS (fig. 3). Although not specifically studied, paired stimulation appeared to decrease the stimulus intensity needed to elicit a detectable response. One patient had only one detectable response to four separate single stimuli. With paired stimulation and an ISI of 2–5 ms, responses of 150–350  $\mu$ V could be recorded, whereas no facilitation was obtained when ISI was increased to 10 ms (fig. 4).

## Discussion

The data derived in the current study indicate that application of paired transcranial stimuli, with an ISI

## MOTOR RESPONSES TO PAIR

Table 1. Patient Data

| Patient No. | Age (yr) | Gender |
|-------------|----------|--------|
| 1           | 38       | F      |
| 2           | 18       | M      |
| 3           | 13       | F      |
| 4           | 68       | M      |
| 5           | 34       | F      |
| 6           | 31       | M      |
| 7           | 47       | F      |
| 8           | 16       | F      |
| 9           | 40       | F      |
| 10          | 37       | F      |
| 11          | 21       | M      |

of 2–3 ms, in  $N_2O$ -sufentanil results in increase in tc-MER amp patients. Our findings suggest t

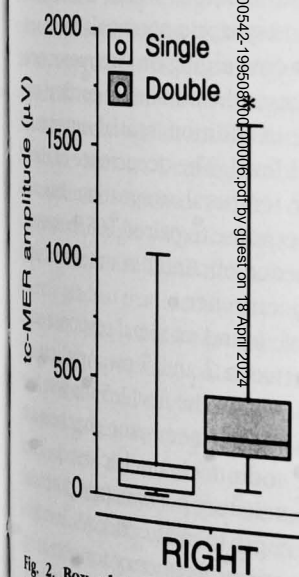

Fig. 2. Box plots of compound muscle action potentials (CMAPs) in the tibialis anterior muscle in response to single and paired transcranial electrical stimulation. The plot shows the distribution of amplitudes of motor evoked CMAPs for single (open boxes) and paired (shaded boxes) stimulation (tc-MER) is skewed.

## MOTOR RESPONSES TO PAIRED TRANSCRANIAL STIMULATION

Table 1. Patient Data

| Patient No. | Age (yr) | Gender | ASA Physical Status | Disease                                               | Operation                                       |
|-------------|----------|--------|---------------------|-------------------------------------------------------|-------------------------------------------------|
| 1           | 38       | F      | I                   | Scoliosis                                             | Transthoracic fusion and dorsal instrumentation |
| 2           | 18       | M      | I                   | Scheuermann's disease, scoliosis                      | Transthoracic spinal fusion                     |
| 3           | 13       | F      | I                   | Scoliosis                                             | Cotrel-Dubousset instrumentation                |
| 4           | 68       | M      | III                 | Thoracic aortic aneurysm                              | Repair of aortic aneurysm                       |
| 5           | 34       | F      | I                   | Scoliosis                                             | Cotrel-Dubousset instrumentation                |
| 6           | 31       | M      | I                   | Scoliosis                                             | Transthoracic fusion and dorsal instrumentation |
| 7           | 47       | F      | I                   | Kyphosis                                              | Transthoracic fusion and dorsal instrumentation |
| 8           | 16       | F      | I                   | Scoliosis and kyphosis                                | Transthoracic fusion and dorsal instrumentation |
| 9           | 40       | F      | I                   | Vertebral fracture L1                                 | Transthoracic fusion and dorsal instrumentation |
| 10          | 37       | F      | I                   | Vertebral fracture L1                                 | Transthoracic fusion and dorsal instrumentation |
| 11          | 21       | M      | II                  | Mycotic aortic aneurysm operated coarctation of aorta | Repair of aortic aneurysm                       |

of 2–3 ms, in N<sub>2</sub>O–sufentanil–anesthetized patients results in increase in tc-MER amplitude just as in awake patients. Our findings suggest that paired stimulation

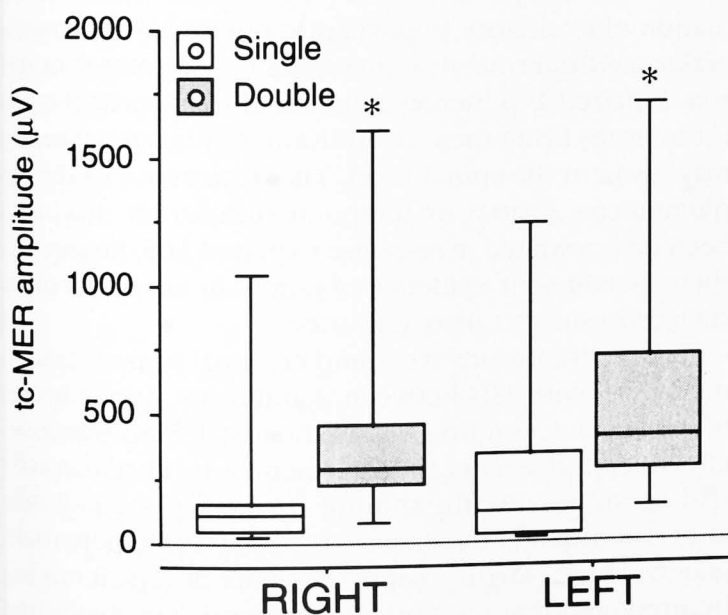

Fig. 2. Box plots of compound muscle action potentials (CMAPs) in the tibialis anterior muscle to single or paired transcranial electrical stimulation. Horizontal bars = 90th, 75th, 50th (median), 25th, and 10th percentiles. The distribution of amplitudes of motor evoked responses to transcranial stimulation (tc-MER) is skewed. \* $P < 0.01$  compared with single-pulse stimulation.

may be preferable in terms of MER amplitudes and reproducibility to the more commonly used single-pulse TCS paradigms for intraoperative monitoring.

It is unknown whether facilitation by paired TCS occurs predominantly at the cortical or spinal level, and

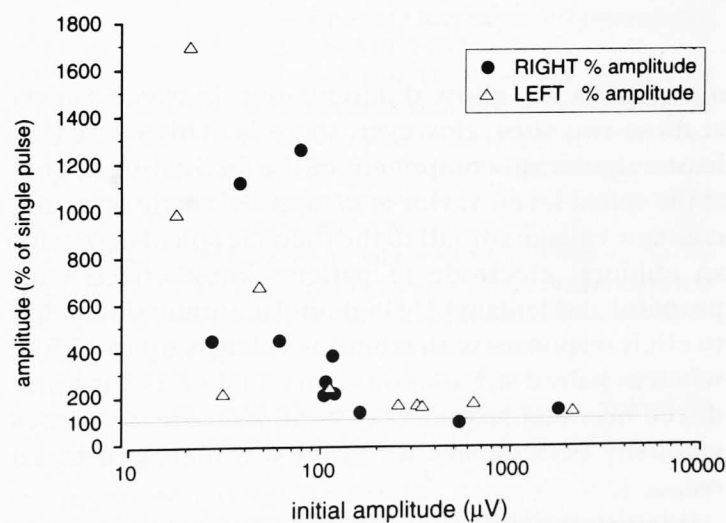

Fig. 3. Relative increase in amplitudes of motor evoked responses to transcranial stimulation (tc-MER) (expressed as a percentage of the single-pulse amplitude in the left and right tibialis anterior muscles) versus absolute amplitude with single-pulse TCS. Maximum augmentation occurred when single-pulse transcranial stimulation (TCS) elicited responses of less than 100  $\mu$ V.

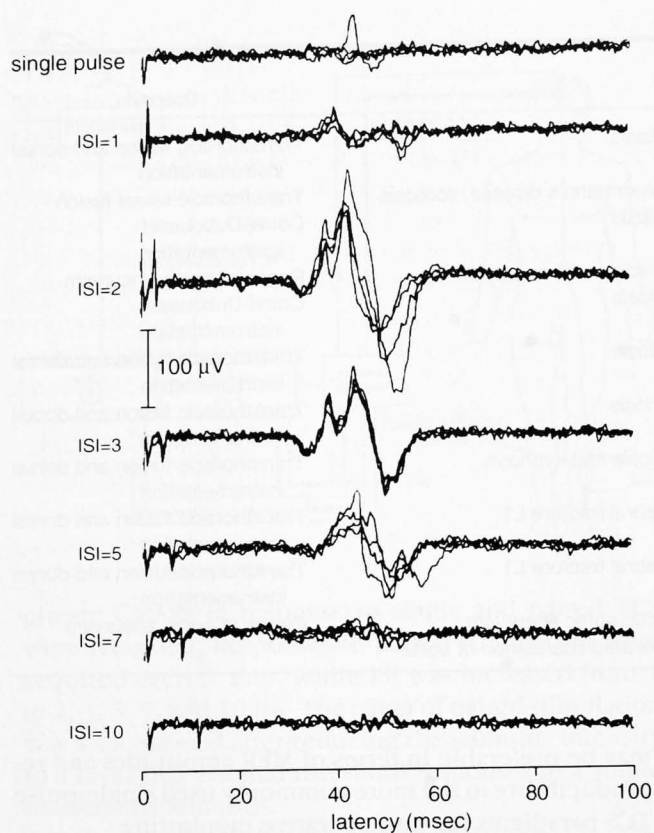

Fig. 4. Influence of interstimulus interval on amplitude of motor evoked responses to transcranial stimulation (tc-MERs) with paired transcranial stimuli. Maximum amplitude augmentation occurred with interstimulus intervals between 2 and 5 ms.

our data do not allow differentiation between effects at these two sites. However, there is evidence that at least a significant component of the facilitation occurs at the spinal level. Taylor *et al.* applied single or paired constant-voltage stimuli to the thoracic spinal cord with an epidural electrode in patients anesthetized with propofol and fentanyl.<sup>19</sup> Single-pulse stimulation failed to elicit responses with stimulus voltages up to 125 V, whereas paired stimulation with an ISI of 2–5 ms produced maximal responses (20–30  $\mu$ V). The responses gradually became smaller as ISI was increased to 10 ms.

It is also possible that paired TCS alters the pattern of efferent activity in the descending motor pathways. That pattern is, in general, characterized by an initial direct wave followed by a series of indirect waves. Multiple indirect waves can occur as the result of repetitive transsynaptic activation in the motor

cortex<sup>20</sup> and, accordingly, it is possible that paired stimulation increases the number of indirect waves. Epidural recordings have shown that at least one anesthetic, isoflurane, decreases the number of indirect waves after a single transcranial electrical stimulus, whereas the initial direct wave is unaffected.<sup>21</sup> Paired stimulation may either increase the number of cortical motor neurons firing, increase the number of indirect waves travelling down the spinal cord, or both. Therefore, it is at least possible that paired stimulation produces facilitation at both the cortical and the spinal level.

A more likely explanation for the facilitation of tc-MERs by paired TCS is that the first stimulus lowers the excitation threshold of the cortical and spinal motor neurons, thereby facilitating the initiation of neuronal discharge by the second stimulus. This phenomenon is known as temporal summation. Each time a neuronal terminal depolarizes, sodium channels open for a period of 1–2 ms. After closure of the channels, the resulting excitatory postsynaptic potential decreases over the next 10–15 ms. A second opening of the same channels within this period will result in an augmentation (temporal summation) of the excitatory postsynaptic potential.<sup>22</sup> The more rapid the rate of repetitive depolarization, the greater the postsynaptic potential that develops. The counterpart of temporal summation is spatial summation, which is the summation of excitatory postsynaptic potentials from several synaptic terminals converging on one motor neuron. If paired TCS increases the number of cortical motor neurons firing then, in addition, spatial summation may occur at the spinal level. The occurrence of these phenomena, spatial or temporal summation, has not been demonstrated in response to paired TCS, however, there is sufficient evidence obtained in other circumstances to suspect its occurrence.

In the current study we found maximal response augmentation with ISIs between 2 and 5 ms. Application of the second stimulus within the first 1.5 ms was less effective, perhaps because the membrane channels are still open. Because the sodium channels close 1–2 ms after stimulus and the excitatory postsynaptic potential generated by a single synapse thereafter decays, it might be predicted that the optimal frequency for obtaining facilitation would occur with an ISI in the vicinity of 2 ms.<sup>16,17,19</sup> Our findings were consistent with that prediction.

The instrumentation available for the current investigation provided the capacity for the delivery of only

two successive stimuli. It is concluded that with more than two successive stimuli, the increase in tc-MER amplitudes is not linear. Using conventional constant current stimulation, at least three successive pulses with an ISI of 2 ms were required to obtain responses (40–60  $\mu$ V) during propofol and intravenous anesthesia.<sup>23</sup> Manufacturing and magnetic transcranial stimulation developing stimulators that will allow performing multiple pulse stimulation with stimulators become available it will be possible to determine optimal multiple pulse paradigms. It should be kept in mind, however, that pulse stimulation increases the total charge delivered. Single and dual stimulation appear to be more efficient than multiple stimulation and dual stimulation need not necessarily result in doubling of the net charge delivered. It may be obtained at lower stimulus intensities with multiple stimulus paradigms. The order of delivered and duration of stimulation should be explored to determine the most effective protocols for the possibility of the epileptogenic potential for the possibility of the epileptogenic potential injury that have not thus far been reported for single or dual stimuli.

We chose to evaluate latency to onset of specific peaks because CMAPs of different characteristic morphologic nature and significant variation both within and between patients. Latency appeared to decrease slightly with paired stimuli in our investigation, but that there were significant limitations in determining latency. Determination of low-amplitude responses (which are often responses to single stimuli) was so difficult that the slope of the initial CMAP deflection was not sufficiently gradual that identification of "onset" may have been unreliable. Amplitudes of responses to paired stimuli were not only more rapid deviation from baseline but also introduced a bias toward shorter latencies. A mathematical definition of onset latency (such as the 2-SD deflection from the average level) would aid in uniform determination and facilitate comparison among patients. Our data suggest that the relative facilitation associated with paired stimulation is a function of the initial amplitude of the response to the first stimulus. The smaller the initial response to the first stimulus, the greater the effect of the second stimulus.

## MOTOR RESPONSES TO PAIRED TRANSCRANIAL STIMULATION

two successive stimuli. It is conceivable that stimulation with more than two successive pulses would further increase tc-MER amplitudes. Nadstawek *et al.*, using conventional constant current stimulators reported that at least three successive pulses of 60 mA with an ISI of 2 ms were required to obtain recordable responses (40–60  $\mu$ V) during propofol–alfentanil total intravenous anesthesia.<sup>2,3</sup> Manufacturers of electrical and magnetic transcranial stimulators are currently developing stimulators that will include the option of performing multiple pulse stimulation. When these stimulators become available it will become possible to determine optimal multiple pulse stimulation paradigms. It should be kept in mind, however, that multiple pulse stimulation increases the total energy delivered. Single and dual stimulation appear to be well tolerated, and dual stimulation need not necessarily result in a doubling of the net charge delivered if responses can be obtained at lower stimulus intensities. However, with multiple stimulus paradigms, both total energy delivered and duration of stimulus will increase. These protocols should be explored carefully with respect for the possibility of the epileptogenesis or direct neuronal injury that have not thus far been observed with single or dual stimuli.

We chose to evaluate latency to onset rather than latency to specific peaks because CMAPs do not have consistent, characteristic morphologic features and may exhibit significant variation both within and between patients. Onset latency appeared to decrease slightly with the application of paired stimuli in our investigation. However, we feel that there were significant limitations in our capacity to determine latency. Determination of onset latency for low-amplitude responses (which constituted many of the responses to single stimuli) was sometimes difficult. The slope of the initial CMAP deflection was occasionally sufficiently gradual that identification of the precise moment of "onset" may have been unreliable. The greater amplitudes of responses to paired stimuli, with the concomitantly more rapid deviation from baseline, may have introduced a bias toward shorter apparent latencies. A mathematical definition of onset latency (*e.g.*, a greater than 2-SD deflection from the average baseline noise level) would aid in uniform determination of CMAP onset and facilitate comparison among published results.

Our data suggest that the relative amplitude increase associated with paired stimulation is dependent on the initial amplitude of the response to single stimulation. The smaller the initial response to a single transcranial stimulus, the greater the effect of paired stimulation.

This is in agreement with the results of Inghilleri *et al.*,<sup>17</sup> who observed that the increase of the abductor pollicis brevis MER after paired TCS in awake subjects was inversely correlated with the amplitude of the control response. In our study, paired TCS had only a minor effect in patients who had high-amplitude (>300  $\mu$ V) tc-MERs in response to single-pulse TCS. Motoneuronal firing is a quantal response, and therefore tc-MER amplitudes are directly proportional to the number of motor neurons firing. If single-pulse TCS resulted in firing of all tibialis anterior muscle motor units in some of our patients, further augmentation with the application of a second stimulus would not be expected.

In conclusion, we have demonstrated that application of paired transcranial electrical stimuli significantly increases amplitudes of intraoperative MERs during anesthetic-induced depression of the motor system. The results of this study justify further clinical evaluation of the efficacy and safety of double-pulse TCS as an adjunct to monitoring during surgical procedures that place motor pathways at risk.

## References

1. Lesser RP, Raudzens P, Luders H, Nuwer MR, Goldie WD, Morris HH, Dinner DS, Klem G, Hahn JF, Shetter AG, Ginsburg HH, Gurd AR: Postoperative neurological deficits may occur despite unchanged intraoperative somatosensory evoked potentials. *Ann Neurol* 19:22–25, 1986
2. Ben-David B, Haller G, Taylor P: Anterior spinal fusion complicated by paraplegia: A case report of a false-negative somatosensory-evoked potential. *Spine* 12:536–539, 1987
3. Dawson EG, Sherman JE, Kanim LE, Nuwer MR: Spinal cord monitoring: Results of the Scoliosis Research Society and the European Spinal Deformity Society Survey. *Spine* 16:S361–S364, 1991
4. Calancie B, Klose KJ, Baier S, Green BA: Isoflurane-induced attenuation of motor evoked potentials caused by electrical motor cortex stimulation during surgery. *J Neurosurg* 74:897–904, 1991
5. Kalkman CJ, Drummond JC, Ribberink AA: Low concentrations of isoflurane abolish motor evoked responses to transcranial electrical stimulation during nitrous oxide/opioid anesthesia in humans. *Anesth Analg* 73:410–415, 1991
6. Zentner J, Kiss I, Ebner A: Influence of anesthetics—nitrous oxide in particular—on electromyographic response evoked by transcranial electrical stimulation of the cortex. *Neurosurgery* 24:253–256, 1989
7. Schönle PW, Isenberg C, Crozier TA, Dressler D, Machetanz J, Conrad B: Changes of transcranially evoked motor responses in man by midazolam, a short acting benzodiazepine. *Neurosci Lett* 101:321–324, 1989
8. Kalkman CJ, Drummond JC, Ribberink AA, Patel PM, Sano T, Bickford RG: Effects of propofol, etomidate, midazolam, and fentanyl on motor evoked responses to transcranial electrical or magnetic stimulation in humans. *ANESTHESIOLOGY* 76:502–509, 1992

9. Ghaly RF, Stone JL, Aldrete JA, Levy WL: Effects of incremental ketamine hydrochloride doses on motor evoked potentials (MEPs) following transcranial magnetic stimulation: A primate study. *J Neurosurg Anesthesiol* 2:79-85, 1990
10. Kalkman CJ, Drummond JC, Patel PM, Sano T, Chesnut RM: Effects of droperidol, pentobarbital, and ketamine on myogenic transcranial magnetic motor evoked responses in humans. *Neurosurgery* 35:1066-1071, 1994
11. Edmonds HL Jr, Paloheimo MP, Backman MH, Johnson JR, Holt RT, Shields CB: Transcranial magnetic motor evoked potentials (tcMMEP) for functional monitoring of motor pathways during scoliosis surgery. *Spine* 14:683-686, 1989
12. Berardelli A, Cowan JM, Day BL, Dick J, Rothwell JC: The site of facilitation of the response to cortical stimulation during voluntary contraction in man (abstract). *J Physiol (Lond)* 360:360P, 1985
13. Ackermann H, Scholz E, Koehler W, Dichgans J: Influence of posture and voluntary background contraction upon compound muscle action potentials from anterior tibial and soleus muscle following transcranial magnetic stimulation. *Electroencephalogr Clin Neurophysiol* 81:71-80, 1991
14. Lim CL, Yiannikas C: Motor evoked potentials: a new method of controlled facilitation using quantitative surface EMG. *Electroencephalogr Clin Neurophysiol* 85:38-41, 1992
15. Deletis V, Schild JH, Beric A, Dimitrijevic MR: Facilitation of motor evoked potentials by somatosensory afferent stimulation. *Electroencephalogr Clin Neurophysiol* 85:302-310, 1992
16. Kasai T, Hayes KC, Wolfe DL, Allatt RD: Afferent conditioning

of motor evoked potentials following transcranial magnetic stimulation of motor cortex in normal subjects. *Electroencephalogr Clin Neurophysiol* 85:95-101, 1992

17. Inghilleri M, Berardelli A, Cruccu G, Priori A, Manfredi M: Motor potentials evoked by paired cortical stimuli. *Electroencephalogr Clin Neurophysiol* 77:382-389, 1990
18. Day BL, Maertens de Noordhout A, Marsden CD, Nakashima K, Rothwell JC, Thompson PD: A comparison of the effects of anodal and cathodal stimulation of the human motor cortex through the intact scalp (abstract). *J Physiol (Lond)* 394:118P, 1987
19. Taylor BA, Fennelly ME, Taylor A, Farrell J: Temporal summation: The key to motor evoked potential spinal cord monitoring in humans. *J Neurol Neurosurg Psychiatry* 56:104-106, 1993
20. Inghilleri M, Berardelli A, Cruccu G, Priori A, Manfredi M: Corticospinal potentials after transcranial stimulation in humans. *J Neurol Neurosurg Psychiatry* 52:970-974, 1989
21. Hicks RG, Woodforth IJ, Crawford MR, Stephen JPH, Burke DJ: Some effects of isoflurane on I waves of the motor evoked potential. *Br J Anaesth* 69:130-136, 1992
22. Guyton AC: Organisation of the nervous system: Basic functions of synapses and transmitter substances, *Textbook of Medical Physiology*. Philadelphia, WB Saunders, 1991, pp 478-494
23. Nadstawek J, Pechstein U, Taniguchi M, Schramm J: Repetitive transcranial electric stimulation for myogenic motor evoked potentials under balanced anesthesia with isoflurane, nitrous oxide, and alfentanil *versus* total intravenous anesthesia with propofol and alfentanil (abstract). *ANESTHESIOLOGY* 79:A462, 1993

## Pharmacokinetic encapsulated Fen

Oriando R. Hung, M.D.,\* Sara C. Whyte,  
Michael Mezei, Ph.D.†

**Background:** Pulmonary administration of fentanyl can provide satisfactory but brief analgesia. Liposomes are microscopic phospholipid vesicles that trap drug molecules. Liposomal fentanyl has the potential to control the uptake of fentanyl, thus providing sustained drug release. The pharmacokinetic profiles after the inhalation of a mixture of free and liposomal fentanyl can provide a rapid increase in fentanyl concentrations ( $C_{ten}$ ), thus providing satisfactory analgesia. This study compares the pharmacokinetic profiles after the inhalation of encapsulated fentanyl in healthy volunteers.

**Methods:** After obtaining informed consent, ten healthy volunteers (five men and five women) were studied. Each subject received intravenous fentanyl and inhaled 2,000  $\mu$ g of free and liposome-encapsulated fentanyl. Frequent venous blood samples were determined by radioimmunoassay. Pharmacokinetic parameters and absorption characteristics of

\* Associate Professor, Department of Anesthesiology, Dalhousie University, Halifax, Nova Scotia, Canada

† Research Associate, Department of Anesthesiology, Dalhousie University, Halifax, Nova Scotia, Canada

‡ Staff Anesthesiologist, Department of Community Health Center, Lincoln, Nebraska

§ Associate Professor, Department of Anesthesiology, School of Medicine; Staff Anesthesiologist, Administration Medical Center, Palo Alto, California

|| Professor Emeritus, College of Pharmacy, Dalhousie University, Halifax, Nova Scotia, Canada

Received from the Departments of Anesthesiology, College of Pharmacy, Dalhousie University, Halifax, Nova Scotia, Canada; Department of Anesthesiology, St. Elizabeth's Hospital, Lincoln, Nebraska; and Department of Anesthesiology, School of Medicine, Palo Alto, California.

Supported in part by the Canadian Anesthesiologists' Foundation and the Medical Research Council of Canada.

Dr. Mezei have submitted a patent application for this drug delivery system (serial number 1,278,219).

Address correspondence to Dr. Hung: Oriando R. Hung, M.D., 1278 Tower B3H 2Y9 Canada.

Anesthesiology, V 83, No 2, Aug 1995
